# Supplementary material
Source: ML conference proceedings conference paper supplement (https://openaccess.thecvf.com/content/CVPR2024/html/Kim_Frequency-aware_Event-based_Video_CVPR_2024_paper.html)
Supplement: Supplementary file 2 [file Kim_Frequency-aware_Event-based_Video_CVPR_2024_supplemental.zip]

Archive with 2 entries (2 files):
- 2848_supp/2848.pdf
- 2848_supp/2848_supp.mp4
